# Supplementary material for: Structure of Ty1 Internally Initiated RNA Influences Restriction Factor Expression
Source: MDPI journal article supplement (doi:10.3390/v9040074), 2017-04-10
Supplement: s1 [file s1]

Table S2. Quantitation of the translation products from the gel in Figure 2. The band intensities were normalized to the level of translation from the AUG1AUG2 RNA.

|                               | AUG1 | AUG2 |
|-------------------------------|------|------|
| RNA AUG1AUG2                  | 100% |      |
| RNA AUG1AUG2*                 | 22%  | 4%   |
| RNA AUG1 <sup>stop</sup> AUG2 | -    | 9%   |
| RNA AUG1 <sup>frs</sup> AUG2  | 51%  | 8%   |
