# Supplementary material for: Structure of Ty1 Internally Initiated RNA Influences Restriction Factor Expression
Source: MDPI journal article supplement (doi:10.3390/v9040074), 2017-04-10
Supplement: s1 [file s1]

| Primer name                 | Sequence 5'-3'                                                                                                               |
|-----------------------------|------------------------------------------------------------------------------------------------------------------------------|
| F-AUG1AUG2                  | <b>TAATACGACTCACTATAGGGTCAAAGACATCCTATCC</b>                                                                                 |
| F-AUG1GCG2                  | <b>TAATACGACTCACTATAGGGTCAAAGACATCCTATCCGTTGATTATACGGATATCATGAAAATTCTTTCCAAAAGTATTGAAAAAGCGCAATCTGATACCCAAGAGGCAAACGACA</b>  |
| F-AUG1GUG2                  | <b>TAATACGACTCACTATAGGGTCAAAGACATCCTATCCGTTGATTATACGGATATCATGAAAATTCTTTCCAAAAGTATTGAAAAAGUGCAATCTGATACCCAAGAGGCAAACGACA</b>  |
| F-AUG1AUG2( $\Delta$ 5'UTR) | <b>TAATACGACTCACTATAGGATATCATGAAAATTCTTTCC</b>                                                                               |
| F-AUG1AUG2(RND)             | <b>TAATACGACTCACTATAGGATCACTTCAAGACGACACACAATTCATCAGGATATCATGAAAATTCTTTCCAAAAG</b>                                           |
| F-AUG1AUG2( $\Delta$ H1)-A  | <b>GGATATCATGAAAATTCTTTCC</b>                                                                                                |
| F-AUG1AUG2( $\Delta$ H1)-B  | <b>TAATACGACTCACTATAGGGTCAAAGACATCCGGATATCATGAAAATTCTTTCC</b>                                                                |
| F-AUG1AUG2*-A               | <b>CCTATCCGTTGATTATACGGATATCATGAAAATTCTTTCCAAAAGTATTGAAAAAGCGCAATCTGATACCCAAGAGGCAAAAAAATGCAAACCTGGCAAATTTGCAATATAATGG</b>   |
| F-AUG1AUG2*-B               | <b>TAATACGACTCACTATAGGGTCAAAGACATCCTATCCGTTGATTATACGGATATC</b>                                                               |
| F-AUG1 <sup>stop</sup> AUG2 | <b>TAATACGACTCACTATAGGGTCAAAGACATCCTATCCGTTGATTATACGGATATCATGAAAATTCTTTCCAAAAGTATTGAAAAAATGCAATCTGATACCCAAGAGGCAAACGACA</b>  |
| F-AUG1 <sup>frs</sup> AUG2  | <b>CTATCCGTTGATTATACGGATATCATGAAAATTCTTTATCCAAAAGTATTGAAAAATGCAATCTGATACCCAAGAGGCAAACGACATTGAGACCCTGGCAAATTTGCAATATAATGG</b> |
| F-241-Gag                   | <b>TAATACGACTCACTATAGGAGGAGAACTTCTAGTATATTC</b>                                                                              |
| F-816-Gag                   | <b>TAATACGACTCACTATAGGTAAACCTCACCTAATGAC</b>                                                                                 |
| F-953-Gag                   | <b>TAATACGACTCACTATAGGTATAACACTTTTCAAATATTTGCTCCC</b>                                                                        |
| F-241-Gag( $\Delta$ 5'UTR)  | <b>TAATACGACTCACTATAGTCAACAATGGAATCCCAACAATTATCTCAAC</b>                                                                     |
| R-AUG1AUG2                  | <b>TTTACTGTAGATTCAAGTTTCTGG</b>                                                                                              |
